# Supplementary material
Source: PubMed Central journal article supplement (PMC7784877)

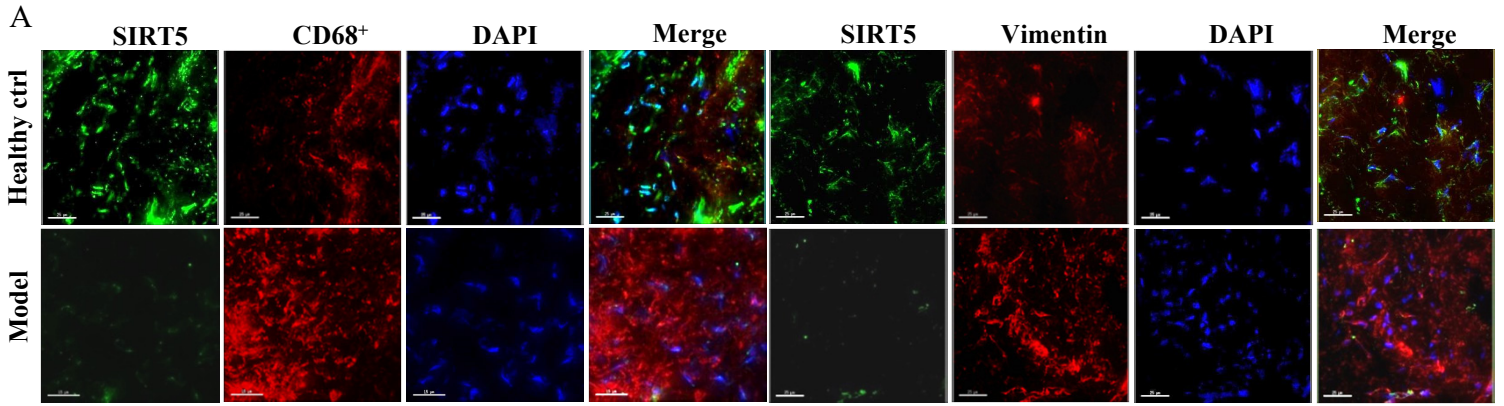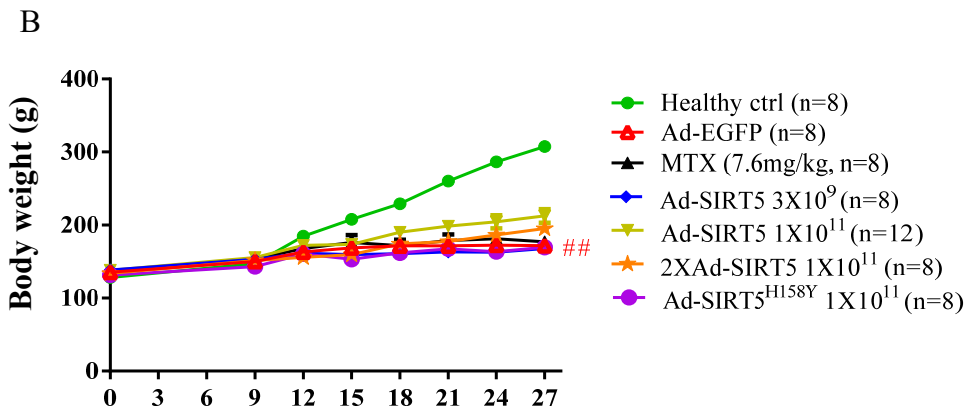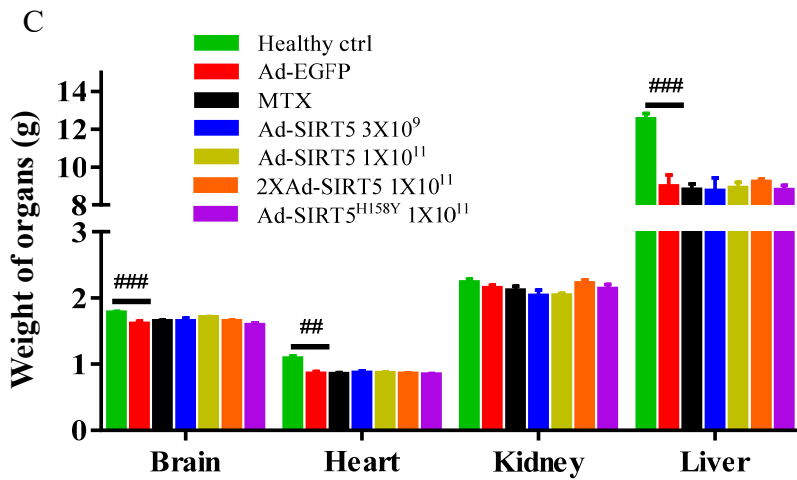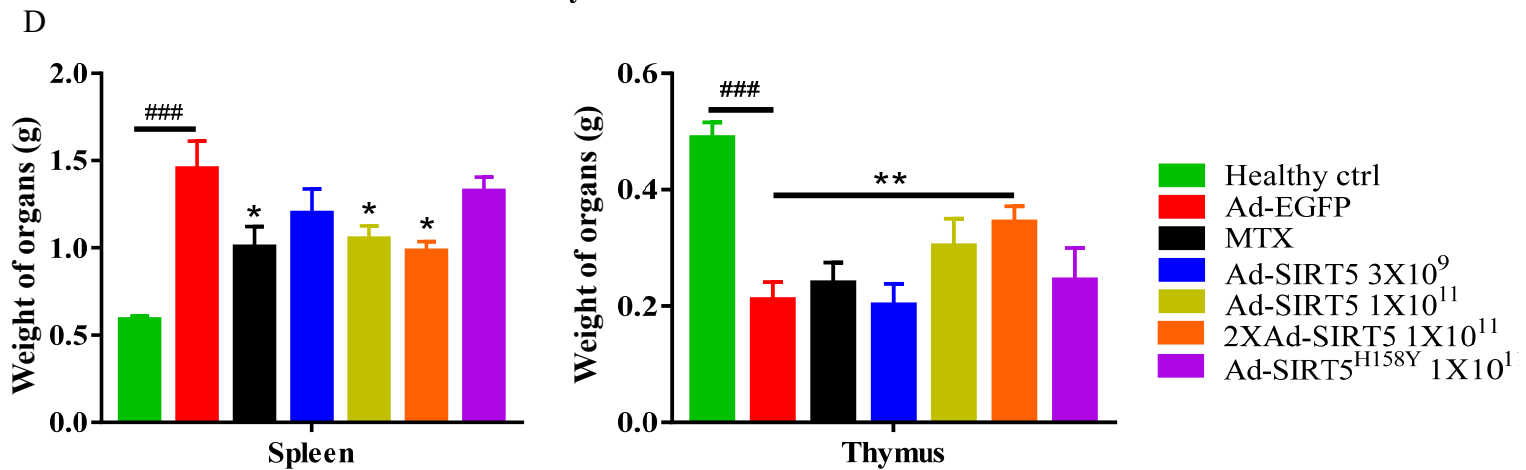

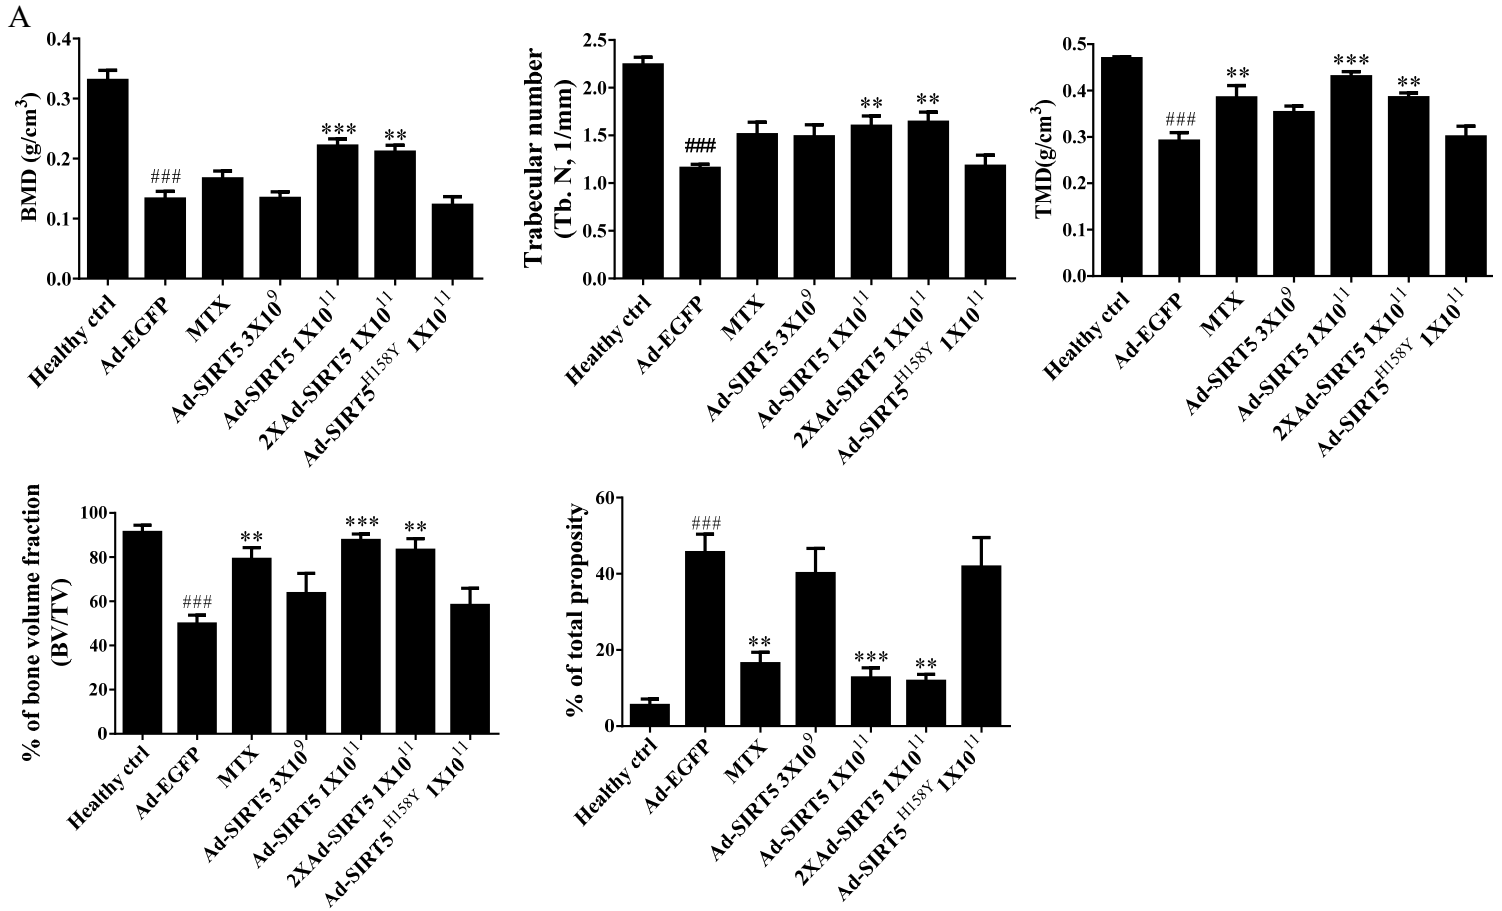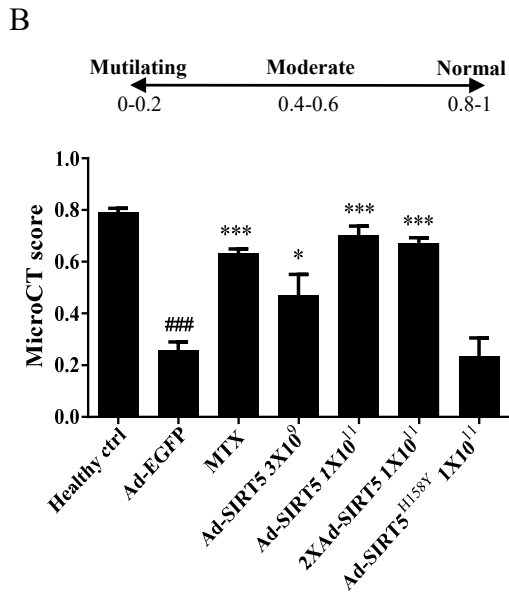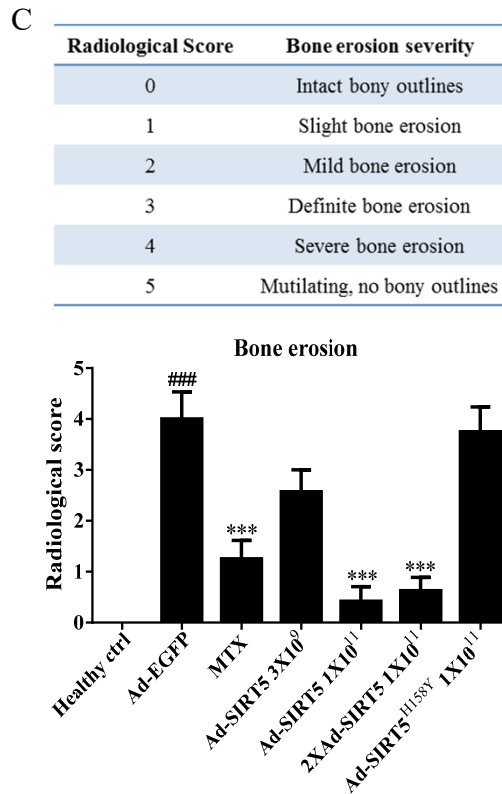

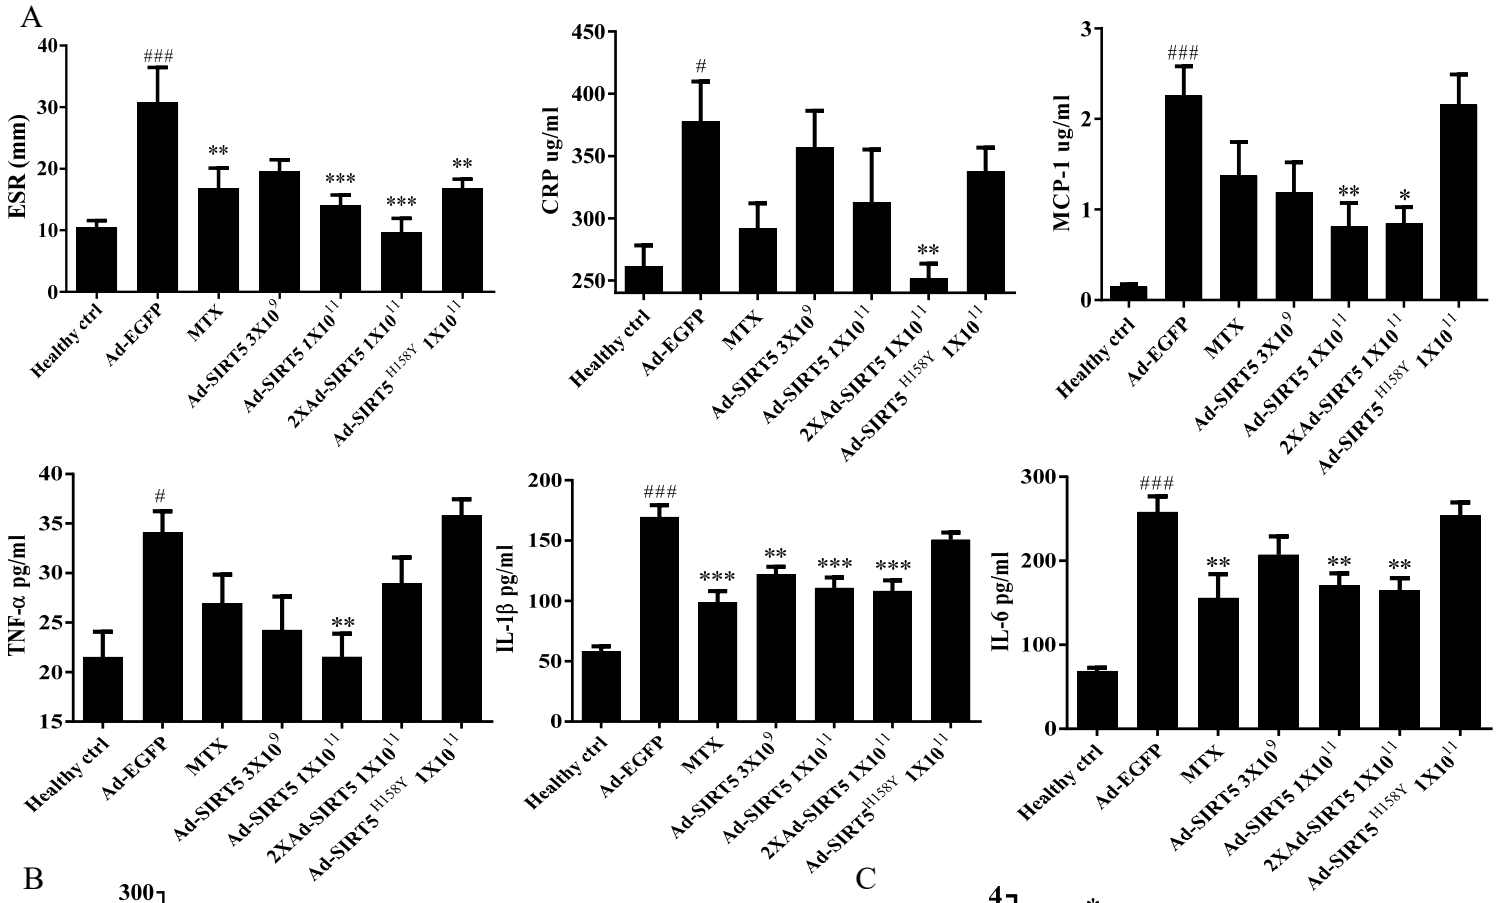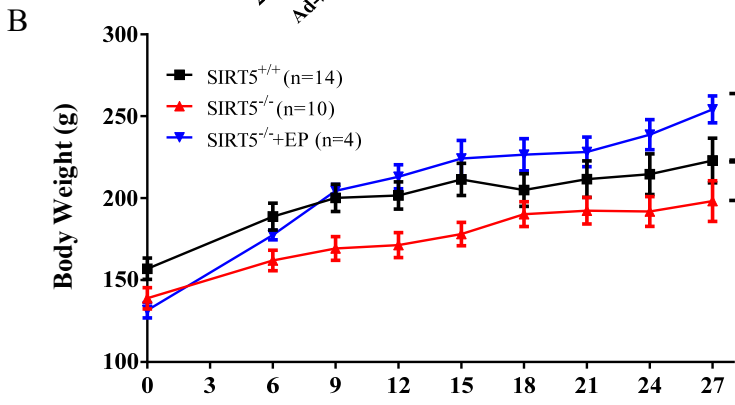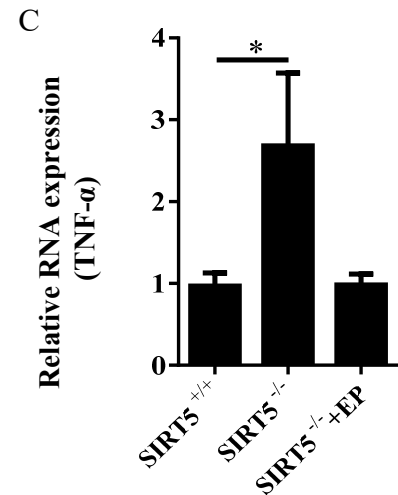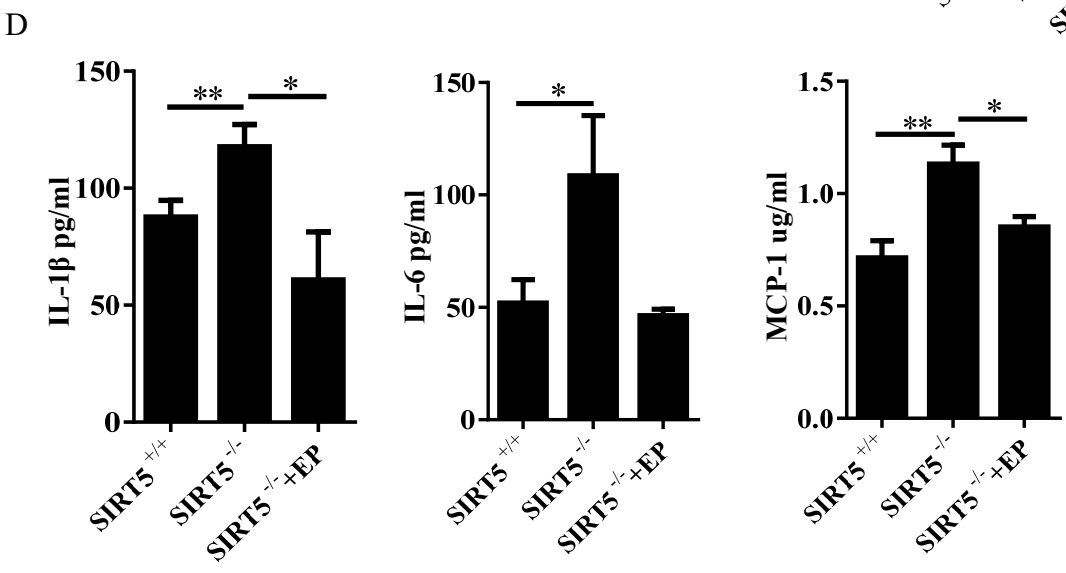

Supplement: 41423_2020_380_MOESM1_ESM.pdf [file 41423_2020_380_MOESM1_ESM.pdf]
